# Supplementary material for: On the energetics of binding and hydride exchange in the RuH2(H2)2[P(C5H9)3)]2 complex as revealed by inelastic neutron scattering and DFT studies
Source: Royal Society of Chemistry journal article supplement (doi:10.1039/d2nj02100e), 2022-01-01
Supplement: d2nj02100e1.pdf [file d2nj02100e1.pdf]

Supplementary information for: **New Journal of Chemistry, RSC**

**On the energetics of binding and hydrides exchange in the  $\text{RuH}_2(\text{H}_2)_2[\text{P}(\text{C}_5\text{H}_9)_3]_2$  Complex as Revealed by Inelastic Neutron Scattering and DFT Studies**

A. Albinati, M. Grellier, J. Ollivier, and P.A. Georgiev\*

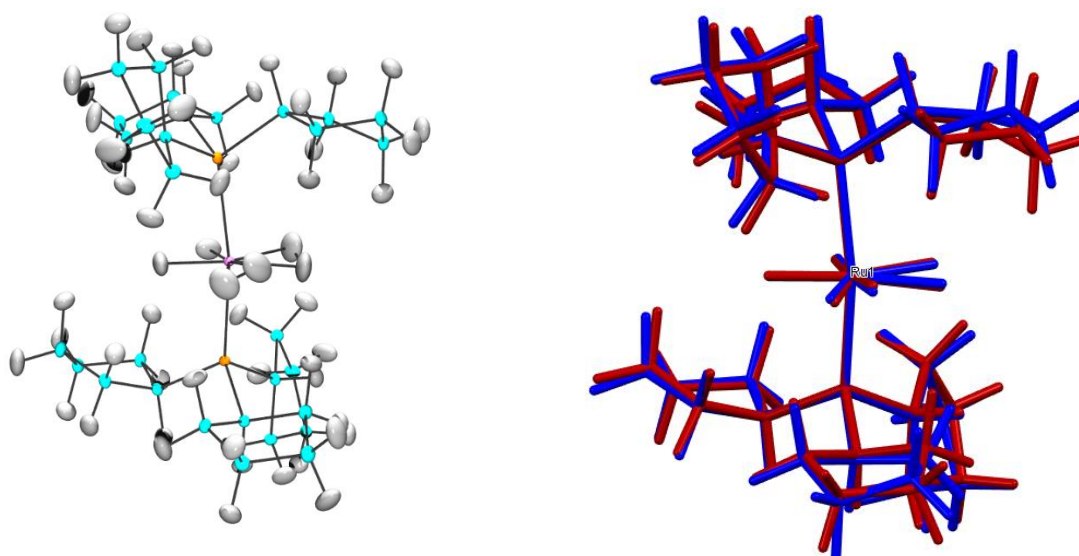

**Figure S1.** ORTEP drawing of the  $\text{RuH}_2(\text{H}_2)_2[\text{P}(\text{C}_5\text{H}_9)_3]_2$  complex on the left, Colour codes: Ru orchid, C cyan, H Gray, and a comparison between the experimental neutron diffraction and the B3LYP/BS2 relaxed structures.

**Atomic cartesian coordinates of computed final structures:**

**1. The fully optimized (b3lyp/BS2)  $\text{RuH}_2(\text{H}_2)_2[\text{P}(\text{C}_5\text{H}_9)_3]_2$  complex, along with the used basis**

|    |             |             |             |
|----|-------------|-------------|-------------|
| P  | -2.31259200 | 0.23031500  | 0.13437300  |
| P  | 2.34199100  | -0.30409800 | -0.08405400 |
| Ru | 0.00311000  | -0.22934900 | 0.16452800  |
| C  | -3.40456200 | -0.45941500 | 1.50391300  |
| C  | -2.96434200 | -0.04885200 | 2.94939200  |
| C  | -3.01971200 | -1.34110200 | 3.80506400  |
| C  | -3.89682800 | -2.31210100 | 2.99948200  |

|   |             |             |             |
|---|-------------|-------------|-------------|
| C | -3.50281000 | -2.00507300 | 1.54639100  |
| C | -2.81449000 | 2.03971900  | 0.14490700  |
| C | -2.32983800 | 2.88201900  | 1.34546500  |
| C | -2.49584600 | 4.32672300  | 0.84822500  |
| C | -1.99834100 | 4.26995800  | -0.60916200 |
| C | -2.31396100 | 2.82782200  | -1.10371400 |
| C | -3.17502900 | -0.31797400 | -1.44271000 |
| C | -4.70481200 | -0.11836000 | -1.56357100 |
| C | -5.07623400 | -0.98787500 | -2.77547700 |
| C | -4.24602200 | -2.26713300 | -2.56185500 |
| C | -2.92777600 | -1.79704200 | -1.88534800 |
| C | 3.16075100  | -1.97854400 | -0.35036700 |
| C | 2.70956700  | -2.77770300 | -1.59470800 |
| C | 3.12492600  | -4.21982500 | -1.26433400 |
| C | 2.74247100  | -4.37142300 | 0.21917500  |
| C | 2.95358500  | -2.96351100 | 0.84448600  |
| C | 3.30712100  | 0.24825500  | 1.43503700  |
| C | 2.86414000  | 1.61013900  | 2.06939500  |
| C | 4.17063400  | 2.32651900  | 2.49936600  |
| C | 5.24143400  | 1.22332700  | 2.52744600  |
| C | 4.85205400  | 0.33209800  | 1.33666900  |
| C | 3.08144800  | 0.69612700  | -1.48842900 |
| C | 2.52786000  | 0.32760200  | -2.90659300 |
| C | 2.20329300  | 1.67260500  | -3.60439800 |
| C | 2.99625900  | 2.72837200  | -2.81870700 |
| C | 2.88408700  | 2.22839600  | -1.37005600 |
| H | -4.41329600 | -0.06418400 | 1.33382200  |
| H | -1.96206400 | 0.38703600  | 2.96859800  |
| H | -3.64630000 | 0.71095300  | 3.34357900  |
| H | -2.01240100 | -1.76283800 | 3.90808100  |
| H | -3.39627000 | -1.15840600 | 4.81651600  |
| H | -4.95969700 | -2.08507300 | 3.15515200  |
| H | -3.74232500 | -3.36119300 | 3.27321800  |
| H | -4.21380100 | -2.40103300 | 0.81474500  |
| H | -2.52458900 | -2.45491000 | 1.33495500  |
| H | -3.91276000 | 2.05673100  | 0.15121400  |
| H | -2.89183200 | 2.68174700  | 2.26184700  |
| H | -1.27195000 | 2.67295100  | 1.54263300  |
| H | -3.55663000 | 4.60836300  | 0.87795400  |
| H | -1.94999300 | 5.05462300  | 1.45783100  |
| H | -0.91663000 | 4.44189700  | -0.63675700 |

|   |             |             |             |
|---|-------------|-------------|-------------|
| H | -2.45899000 | 5.03762900  | -1.23901400 |
| H | -1.41343000 | 2.36309300  | -1.51484400 |
| H | -3.07342300 | 2.82538100  | -1.89225600 |
| H | -2.70284600 | 0.32307900  | -2.19628100 |
| H | -5.22616000 | -0.49430600 | -0.67444600 |
| H | -4.98588500 | 0.93226800  | -1.68667400 |
| H | -6.15121200 | -1.18166700 | -2.85517700 |
| H | -4.76566000 | -0.48312200 | -3.69932800 |
| H | -4.06780800 | -2.81611300 | -3.49179800 |
| H | -4.78894400 | -2.94629800 | -1.89329400 |
| H | -2.08090900 | -1.83858000 | -2.57598800 |
| H | -2.67183400 | -2.44721900 | -1.04591600 |
| H | 4.23622500  | -1.78599800 | -0.45703000 |
| H | 3.15689100  | -2.40614900 | -2.52026700 |
| H | 1.62029000  | -2.72373500 | -1.71187400 |
| H | 2.64451500  | -4.96368600 | -1.90872400 |
| H | 4.20979200  | -4.33082200 | -1.39074900 |
| H | 1.68710800  | -4.65814600 | 0.29757400  |
| H | 3.32136600  | -5.14754500 | 0.72954600  |
| H | 3.82240900  | -2.94481800 | 1.51027600  |
| H | 2.08387700  | -2.68338300 | 1.44888300  |
| H | 3.07326300  | -0.54041800 | 2.16077000  |
| H | 2.27633500  | 2.21996700  | 1.38203600  |
| H | 2.21824100  | 1.42067600  | 2.93252100  |
| H | 4.44736700  | 3.08143500  | 1.75306900  |
| H | 4.06861000  | 2.84886900  | 3.45588600  |
| H | 5.17050100  | 0.64868500  | 3.46027500  |
| H | 6.26368500  | 1.61058900  | 2.45902900  |
| H | 5.32929500  | -0.65273000 | 1.36226100  |
| H | 5.16414100  | 0.82094900  | 0.40589800  |
| H | 4.15867400  | 0.48938500  | -1.48188000 |
| H | 3.28574600  | -0.23010800 | -3.46641300 |
| H | 1.63509200  | -0.29883300 | -2.84565300 |
| H | 2.44262100  | 1.65937000  | -4.67272000 |
| H | 1.13148500  | 1.88316200  | -3.51171900 |
| H | 2.60899700  | 3.74441900  | -2.95033600 |
| H | 4.04726800  | 2.73365100  | -3.13769000 |
| H | 3.61000900  | 2.69477700  | -0.69622600 |
| H | 1.88011000  | 2.44459000  | -0.98854900 |
| H | 0.22709500  | 1.36494700  | 0.29652300  |
| H | -0.07168700 | 0.16723000  | -1.40212400 |

|   |             |             |             |
|---|-------------|-------------|-------------|
| H | -0.19645500 | -1.76574600 | -0.65769200 |
| H | -0.31783600 | -1.98519300 | 0.15311200  |
| H | 0.17306900  | -0.80117500 | 1.84920400  |
| H | 0.07752500  | 0.04056900  | 1.90047900  |

## 2. The transition state between the reactant (above) and the intermediate state along

### Path A

|    |             |             |             |
|----|-------------|-------------|-------------|
| P  | -2.33557600 | -0.20012600 | -0.16379200 |
| P  | 2.33196300  | 0.26426800  | 0.13572500  |
| Ru | -0.03097500 | 0.27374400  | 0.03852300  |
| C  | -3.35593400 | 0.84830700  | -1.34169900 |
| C  | -2.81967800 | 0.86698900  | -2.81243500 |
| C  | -2.86629100 | 2.34791100  | -3.27114400 |
| C  | -3.80652100 | 3.04496400  | -2.27529900 |
| C  | -3.48329600 | 2.34100400  | -0.94835100 |
| C  | -2.77677200 | -1.93518200 | -0.72675200 |
| C  | -2.20062000 | -2.39060800 | -2.08738700 |
| C  | -2.30939900 | -3.92229700 | -2.02148600 |
| C  | -1.86619400 | -4.25030100 | -0.58446700 |
| C  | -2.34077100 | -3.04798100 | 0.27911700  |
| C  | -3.29628300 | -0.15077500 | 1.44813600  |
| C  | -4.82782600 | -0.35260900 | 1.40895200  |
| C  | -5.25786700 | 0.02398100  | 2.83593800  |
| C  | -4.40860800 | 1.27227500  | 3.15696800  |
| C  | -3.09332300 | 1.11236600  | 2.33768300  |
| C  | 3.23722500  | 1.91253200  | 0.06849400  |
| C  | 2.91502100  | 2.93503100  | 1.18077700  |
| C  | 3.40940600  | 4.26616700  | 0.59276800  |
| C  | 2.94934600  | 4.20211700  | -0.87494600 |
| C  | 3.00803000  | 2.69662200  | -1.26218900 |
| C  | 3.14842300  | -0.57367000 | -1.33507200 |
| C  | 2.62881900  | -2.00229000 | -1.70642000 |
| C  | 3.87658900  | -2.80647500 | -2.15999900 |
| C  | 4.96629100  | -1.75144600 | -2.41730900 |
| C  | 4.69309600  | -0.69611600 | -1.33406600 |
| C  | 3.12009400  | -0.53673200 | 1.63678500  |
| C  | 2.65411100  | 0.06673200  | 3.00362900  |
| C  | 2.38281800  | -1.14074900 | 3.93913500  |
| C  | 3.08131800  | -2.33352900 | 3.26721000  |

|   |             |             |             |
|---|-------------|-------------|-------------|
| C | 2.86595000  | -2.05849500 | 1.77142100  |
| H | -4.36371500 | 0.41507400  | -1.35114600 |
| H | -1.80261800 | 0.47415900  | -2.88007200 |
| H | -3.45375500 | 0.23943400  | -3.44649600 |
| H | -1.86550000 | 2.78925600  | -3.19465900 |
| H | -3.18820700 | 2.45411200  | -4.31200100 |
| H | -4.85473200 | 2.86545800  | -2.54862800 |
| H | -3.66035200 | 4.12937100  | -2.23054800 |
| H | -4.24010200 | 2.50977900  | -0.17582800 |
| H | -2.52528500 | 2.71494700  | -0.56710200 |
| H | -3.87150700 | -1.95380900 | -0.80975900 |
| H | -2.73606700 | -1.96231600 | -2.93906900 |
| H | -1.14885100 | -2.09485700 | -2.16824700 |
| H | -3.35236300 | -4.22811100 | -2.17762000 |
| H | -1.70480800 | -4.42739200 | -2.78221300 |
| H | -0.77323700 | -4.32278000 | -0.54663600 |
| H | -2.26275600 | -5.20557000 | -0.22611900 |
| H | -1.53001700 | -2.70166200 | 0.92611900  |
| H | -3.17914000 | -3.32366100 | 0.92724800  |
| H | -2.87029400 | -0.99821900 | 1.99853100  |
| H | -5.29724600 | 0.33306600  | 0.69259600  |
| H | -5.11855000 | -1.36998100 | 1.12892900  |
| H | -6.33407500 | 0.20359000  | 2.92925000  |
| H | -5.00432600 | -0.79463000 | 3.52127000  |
| H | -4.22041500 | 1.38161100  | 4.22938100  |
| H | -4.94248600 | 2.17465900  | 2.83760000  |
| H | -2.21771200 | 0.98319000  | 2.97838400  |
| H | -2.91115600 | 2.00811600  | 1.73819400  |
| H | 4.30487400  | 1.67125600  | 0.14962400  |
| H | 3.38512700  | 2.68722400  | 2.13611400  |
| H | 1.83232600  | 2.99144900  | 1.35021400  |
| H | 3.02154900  | 5.14040700  | 1.12617700  |
| H | 4.50489100  | 4.31002600  | 0.64814800  |
| H | 1.91797200  | 4.56458400  | -0.95292300 |
| H | 3.55741600  | 4.82797200  | -1.53557400 |
| H | 3.81776900  | 2.49235600  | -1.96987900 |
| H | 2.07344000  | 2.39239900  | -1.74278900 |
| H | 2.87720800  | 0.09358100  | -2.16160000 |
| H | 2.12177500  | -2.49171200 | -0.87393500 |
| H | 1.88860600  | -1.92540900 | -2.50751600 |
| H | 4.20333400  | -3.47746400 | -1.35601700 |

|   |             |             |             |
|---|-------------|-------------|-------------|
| H | 3.67632200  | -3.43397100 | -3.03416700 |
| H | 4.83469600  | -1.30360000 | -3.41092600 |
| H | 5.98178600  | -2.15946400 | -2.37496700 |
| H | 5.19277100  | 0.25749400  | -1.53046800 |
| H | 5.06072100  | -1.06608100 | -0.36913000 |
| H | 4.20199200  | -0.37970100 | 1.54448400  |
| H | 3.43566300  | 0.71529700  | 3.41203400  |
| H | 1.74982400  | 0.67062800  | 2.89340300  |
| H | 2.72635500  | -0.96269900 | 4.96322200  |
| H | 1.30458000  | -1.33194200 | 3.98401900  |
| H | 2.67946700  | -3.30147400 | 3.58503000  |
| H | 4.15453800  | -2.33090500 | 3.50015600  |
| H | 3.51977900  | -2.65355600 | 1.12592000  |
| H | 1.82731200  | -2.28380900 | 1.50563900  |
| H | 0.16823800  | -1.28770600 | -0.23651600 |
| H | -0.11283200 | -0.44909300 | 1.53326100  |
| H | 0.15806700  | 1.73560600  | 1.00471500  |
| H | -0.68325600 | 1.67357400  | 0.88926100  |
| H | -0.01790600 | 1.36300600  | -1.19477800 |
| H | 0.11906600  | 0.02555500  | -1.53355900 |

### 3. The trihydrogen transition state atomic coordinates along path C

|    |             |             |             |
|----|-------------|-------------|-------------|
| P  | -2.34138700 | 0.20683000  | 0.09450700  |
| P  | 2.34181200  | -0.29856400 | -0.12942300 |
| Ru | -0.00784100 | -0.17495100 | 0.07435500  |
| C  | -3.26788900 | -0.11434300 | 1.69766100  |
| C  | -2.69568300 | 0.65899700  | 2.93334900  |
| C  | -2.64242200 | -0.36593200 | 4.09684300  |
| C  | -3.56579700 | -1.51371000 | 3.65973000  |
| C  | -3.31630700 | -1.59607000 | 2.14593700  |
| C  | -2.91299100 | 1.94379900  | -0.32545300 |
| C  | -2.36937300 | 3.08526600  | 0.56442400  |
| C  | -2.58101500 | 4.33948400  | -0.29803000 |
| C  | -2.16329800 | 3.87842600  | -1.70571500 |
| C  | -2.56845800 | 2.38007100  | -1.78562900 |
| C  | -3.31062700 | -0.75271100 | -1.19709100 |
| C  | -4.85251200 | -0.61049300 | -1.21972100 |
| C  | -5.30081000 | -1.78920300 | -2.09840600 |
| C  | -4.40705900 | -2.94685500 | -1.61775100 |

|   |             |             |             |
|---|-------------|-------------|-------------|
| C | -3.04506900 | -2.29269300 | -1.25679300 |
| C | 3.06652800  | -1.84601300 | -0.91472800 |
| C | 2.54692800  | -2.20502400 | -2.32451800 |
| C | 2.93150000  | -3.68524800 | -2.47616700 |
| C | 2.59863200  | -4.28851300 | -1.09855900 |
| C | 2.83311700  | -3.14024100 | -0.07484400 |
| C | 3.28763400  | -0.31355500 | 1.49545300  |
| C | 2.90281700  | 0.79847300  | 2.52616500  |
| C | 4.22269500  | 1.18670600  | 3.24736200  |
| C | 5.22744700  | 0.07786900  | 2.88620100  |
| C | 4.83544000  | -0.29508100 | 1.44763000  |
| C | 3.16926700  | 1.05285200  | -1.13099600 |
| C | 2.63186200  | 1.19443000  | -2.59509300 |
| C | 2.45985000  | 2.71577300  | -2.84491400 |
| C | 3.28133500  | 3.39913000  | -1.73994600 |
| C | 3.06554100  | 2.47685600  | -0.53009500 |
| H | -4.30017100 | 0.21850100  | 1.53391000  |
| H | -1.70396800 | 1.07126600  | 2.73216500  |
| H | -3.35141400 | 1.49930100  | 3.18192200  |
| H | -1.61960400 | -0.74619000 | 4.20846000  |
| H | -2.92877400 | 0.07430600  | 5.05715600  |
| H | -4.61517100 | -1.25411300 | 3.85181300  |
| H | -3.36078500 | -2.45558200 | 4.17962100  |
| H | -4.07810300 | -2.17311400 | 1.61298100  |
| H | -2.34928800 | -2.08180900 | 1.96714600  |
| H | -4.00561100 | 1.93158900  | -0.21882500 |
| H | -2.87563600 | 3.14410700  | 1.53199300  |
| H | -1.30071300 | 2.93664600  | 0.75405100  |
| H | -3.64162400 | 4.62394200  | -0.28960100 |
| H | -2.00954700 | 5.20386600  | 0.05640000  |
| H | -1.07644100 | 3.97215800  | -1.81272600 |
| H | -2.61679200 | 4.47789900  | -2.50142500 |
| H | -1.74726600 | 1.78571100  | -2.19563900 |
| H | -3.43384200 | 2.23193600  | -2.43986600 |
| H | -2.93185400 | -0.32606500 | -2.13336800 |
| H | -5.27715000 | -0.72685800 | -0.21481200 |
| H | -5.18190100 | 0.36046200  | -1.60283600 |
| H | -6.37077400 | -2.00780400 | -2.01506100 |
| H | -5.09451700 | -1.56234900 | -3.15241900 |
| H | -4.30567300 | -3.74245900 | -2.36256000 |
| H | -4.85247100 | -3.40404100 | -0.72560200 |

|   |             |             |             |
|---|-------------|-------------|-------------|
| H | -2.28139900 | -2.50460100 | -2.00957000 |
| H | -2.65864600 | -2.68706600 | -0.31478700 |
| H | 4.14880600  | -1.67640700 | -0.99129500 |
| H | 2.97378200  | -1.57268100 | -3.10748100 |
| H | 1.45753000  | -2.09163900 | -2.36088600 |
| H | 2.40579100  | -4.18269700 | -3.29794000 |
| H | 4.00721100  | -3.77056100 | -2.67849700 |
| H | 1.54698800  | -4.59628800 | -1.07619100 |
| H | 3.19519300  | -5.17775000 | -0.87174100 |
| H | 3.69367800  | -3.34027600 | 0.57126000  |
| H | 1.96164600  | -3.03843400 | 0.58014300  |
| H | 2.99186600  | -1.27560700 | 1.93210000  |
| H | 2.44170200  | 1.66528500  | 2.05015200  |
| H | 2.15908100  | 0.41158700  | 3.22810700  |
| H | 4.58958600  | 2.14760000  | 2.86627900  |
| H | 4.09148500  | 1.30506600  | 4.32750800  |
| H | 5.08782900  | -0.79055900 | 3.54309400  |
| H | 6.27169800  | 0.39424600  | 2.98088300  |
| H | 5.26048400  | -1.24887500 | 1.11936700  |
| H | 5.20073200  | 0.47901700  | 0.76176700  |
| H | 4.23218800  | 0.78706200  | -1.18444100 |
| H | 3.35070300  | 0.76103900  | -3.29776000 |
| H | 1.68411600  | 0.66967200  | -2.73201500 |
| H | 2.76643600  | 3.01197300  | -3.85325600 |
| H | 1.40418800  | 2.99064900  | -2.73389200 |
| H | 2.97171200  | 4.43231700  | -1.54994600 |
| H | 4.34512500  | 3.42025900  | -2.01182000 |
| H | 3.78848600  | 2.64693300  | 0.27400800  |
| H | 2.06235000  | 2.64007000  | -0.12092200 |
| H | 0.08045200  | 1.12116100  | -0.86713100 |
| H | -0.13949800 | -0.56342200 | -1.49667300 |
| H | -0.22738500 | -1.86915200 | 0.05532500  |
| H | -0.10010000 | -1.56448100 | 1.07954800  |
| H | 0.03997500  | -0.69069300 | 1.70352600  |
| H | 0.19622000  | 1.18510100  | 0.93456800  |

**4. Optimized (mPW1/PW91/BS2) RuH<sub>2</sub>(H<sub>2</sub>)<sub>2</sub>[P(C<sub>5</sub>H<sub>9</sub>)<sub>3</sub>]<sub>2</sub> complex coordinates**

|   |             |             |             |
|---|-------------|-------------|-------------|
| P | -2.27196200 | 0.26136900  | 0.13303100  |
| P | 2.29038800  | -0.35170500 | -0.06881800 |



|    |             |             |             |
|----|-------------|-------------|-------------|
| Ru | -0.00935000 | -0.26607700 | 0.23933400  |
| C  | -3.40813600 | -0.26468700 | 1.51721000  |
| C  | -2.97149400 | 0.23638800  | 2.92400900  |
| C  | -3.04380500 | -0.98785300 | 3.85755400  |
| C  | -3.96139500 | -1.97338400 | 3.13501800  |
| C  | -3.56001100 | -1.79030000 | 1.67176400  |
| C  | -2.68304800 | 2.07047400  | -0.02299600 |
| C  | -2.21769000 | 2.97011700  | 1.13355800  |
| C  | -2.18242700 | 4.36332500  | 0.50413900  |
| C  | -1.55798400 | 4.10719700  | -0.86910000 |
| C  | -2.07355700 | 2.71601000  | -1.29711000 |
| C  | -3.11850100 | -0.37279400 | -1.40135700 |
| C  | -4.63397900 | -0.16014000 | -1.55148500 |
| C  | -4.98790700 | -1.07232800 | -2.72637200 |
| C  | -4.18938700 | -2.34733600 | -2.43265400 |
| C  | -2.89228500 | -1.87072000 | -1.73791800 |
| C  | 3.07539900  | -2.01766700 | -0.36911100 |
| C  | 2.59455400  | -2.77766000 | -1.61569100 |
| C  | 2.96487500  | -4.22862400 | -1.30934600 |
| C  | 2.57556200  | -4.38647200 | 0.16291600  |
| C  | 2.85024600  | -3.00760300 | 0.80533800  |
| C  | 3.28219200  | 0.17391300  | 1.42313200  |
| C  | 2.84295800  | 1.51101800  | 2.08749200  |
| C  | 4.14615300  | 2.23049000  | 2.48968800  |
| C  | 5.21897300  | 1.14028000  | 2.47983400  |
| C  | 4.81352200  | 0.27436300  | 1.28583600  |
| C  | 2.99943800  | 0.65027400  | -1.46739200 |
| C  | 2.40611100  | 0.31048700  | -2.86574800 |
| C  | 2.04893300  | 1.66105900  | -3.51425000 |
| C  | 2.88334400  | 2.69143800  | -2.75439500 |
| C  | 2.82117000  | 2.17291700  | -1.31808300 |
| H  | -4.39514200 | 0.15677000  | 1.29358500  |
| H  | -1.96580500 | 0.66499500  | 2.91754000  |
| H  | -3.64769700 | 1.02578800  | 3.26297500  |
| H  | -2.04868200 | -1.43355300 | 3.96275700  |
| H  | -3.38998800 | -0.73030300 | 4.86194600  |
| H  | -5.01128700 | -1.68926400 | 3.27414500  |
| H  | -3.85021200 | -3.00355000 | 3.48474000  |
| H  | -4.27930300 | -2.21571300 | 0.96691500  |
| H  | -2.59559300 | -2.28408200 | 1.50100700  |
| H  | -3.77690300 | 2.13567100  | -0.08130800 |

|   |             |             |             |
|---|-------------|-------------|-------------|
| H | -2.87174300 | 2.91143200  | 2.00657400  |
| H | -1.20779700 | 2.67815000  | 1.44288700  |
| H | -3.20360300 | 4.74762500  | 0.39300100  |
| H | -1.62352200 | 5.08933500  | 1.10144900  |
| H | -0.46816100 | 4.07867400  | -0.77012500 |
| H | -1.79518600 | 4.88660600  | -1.59806800 |
| H | -1.25072700 | 2.10896100  | -1.68434600 |
| H | -2.82902000 | 2.79003300  | -2.08472200 |
| H | -2.62857900 | 0.20978000  | -2.19050300 |
| H | -5.17094800 | -0.49642700 | -0.65692500 |
| H | -4.90212800 | 0.88595200  | -1.72219600 |
| H | -6.06188700 | -1.25178600 | -2.82829600 |
| H | -4.64216200 | -0.61524700 | -3.66077300 |
| H | -3.99208700 | -2.93760100 | -3.33113300 |
| H | -4.76401300 | -2.98761700 | -1.75483500 |
| H | -2.01802700 | -1.97600900 | -2.38389800 |
| H | -2.68693400 | -2.46854700 | -0.84804600 |
| H | 4.15277400  | -1.84248300 | -0.48105900 |
| H | 3.04568700  | -2.40531600 | -2.53768000 |
| H | 1.50697500  | -2.68557300 | -1.72112600 |
| H | 2.46574400  | -4.94792000 | -1.96467500 |
| H | 4.04532200  | -4.36774900 | -1.43353500 |
| H | 1.50842700  | -4.62133300 | 0.23387300  |
| H | 3.11367100  | -5.19678000 | 0.66145500  |
| H | 3.72771400  | -3.03348100 | 1.45739500  |
| H | 2.00040500  | -2.70145100 | 1.42417300  |
| H | 3.07263300  | -0.63177500 | 2.13740000  |
| H | 2.22616700  | 2.12103000  | 1.42674900  |
| H | 2.22440900  | 1.30039100  | 2.96373500  |
| H | 4.39931300  | 2.99332500  | 1.74506000  |
| H | 4.06400300  | 2.74253400  | 3.45195300  |
| H | 5.16599900  | 0.54805300  | 3.40114800  |
| H | 6.23638700  | 1.53391500  | 2.40153900  |
| H | 5.30112600  | -0.70425900 | 1.27681600  |
| H | 5.09424000  | 0.78822000  | 0.35957900  |
| H | 4.07299700  | 0.42800200  | -1.48874900 |
| H | 3.14984600  | -0.22399800 | -3.46361800 |
| H | 1.52312300  | -0.32764600 | -2.78958500 |
| H | 2.22667800  | 1.66919100  | -4.59303300 |
| H | 0.98624100  | 1.87172500  | -3.35558100 |
| H | 2.50532000  | 3.71269000  | -2.85611900 |

|   |             |             |             |
|---|-------------|-------------|-------------|
| H | 3.91914000  | 2.68605600  | -3.11536500 |
| H | 3.57088900  | 2.62194200  | -0.66056100 |
| H | 1.83142900  | 2.38546800  | -0.89958900 |
| H | 0.25253600  | 1.32519200  | 0.29028400  |
| H | -0.09956200 | 0.02708500  | -1.34480400 |
| H | -0.16590700 | -1.83687500 | -0.43815200 |
| H | -0.48008500 | -1.93547500 | 0.37777300  |
| H | 0.38352000  | -0.69582200 | 1.88105700  |
| H | -0.06594700 | 0.05238900  | 1.93810300  |

### 5. Optimized (mPW1/PW91/BS4) $\text{RuH}_2(\text{H}_2)_2[\text{P}(\text{C}_5\text{H}_9)_3]_2$ complex coordinates

|    |             |             |             |
|----|-------------|-------------|-------------|
| P  | -2.27022000 | 0.26521600  | 0.13276800  |
| P  | 2.28903200  | -0.35698700 | -0.06468400 |
| Ru | -0.00960400 | -0.26686600 | 0.24357600  |
| C  | -3.41415900 | -0.25828200 | 1.51079200  |
| C  | -2.98186100 | 0.23848700  | 2.91825000  |
| C  | -3.06187600 | -0.98531500 | 3.84909200  |
| C  | -3.97769400 | -1.96677900 | 3.12174600  |
| C  | -3.57261700 | -1.78164900 | 1.66137500  |
| C  | -2.67566900 | 2.07509500  | -0.02140100 |
| C  | -2.21114500 | 2.97004500  | 1.13696700  |
| C  | -2.15565400 | 4.36166600  | 0.50892600  |
| C  | -1.52833500 | 4.09948900  | -0.86023900 |
| C  | -2.06029800 | 2.71783100  | -1.29197000 |
| C  | -3.11562100 | -0.36196100 | -1.40501500 |
| C  | -4.62797000 | -0.14253400 | -1.55677200 |
| C  | -4.98590300 | -1.05445400 | -2.72880200 |
| C  | -4.19233100 | -2.33079300 | -2.43455900 |
| C  | -2.89442100 | -1.85854200 | -1.74205000 |
| C  | 3.07115100  | -2.02351400 | -0.36515100 |
| C  | 2.59035700  | -2.78027700 | -1.61168900 |
| C  | 2.94258500  | -4.23344600 | -1.30218600 |
| C  | 2.54854900  | -4.38456300 | 0.16793700  |
| C  | 2.84201600  | -3.01089600 | 0.80848100  |
| C  | 3.28531800  | 0.16636000  | 1.42511800  |
| C  | 2.85288700  | 1.50571100  | 2.08546800  |
| C  | 4.15799100  | 2.22941500  | 2.46548100  |
| C  | 5.22797200  | 1.13859000  | 2.46323700  |
| C  | 4.81506600  | 0.25904400  | 1.28352300  |

|   |             |             |             |
|---|-------------|-------------|-------------|
| C | 3.00000700  | 0.64220300  | -1.46377600 |
| C | 2.40569600  | 0.30277700  | -2.85976300 |
| C | 2.04979400  | 1.65163200  | -3.50865600 |
| C | 2.88352800  | 2.68130800  | -2.74987200 |
| C | 2.82560900  | 2.16333300  | -1.31477600 |
| H | -4.39495200 | 0.16935600  | 1.27881100  |
| H | -1.97610900 | 0.66297100  | 2.91551300  |
| H | -3.65567400 | 1.02883400  | 3.25573100  |
| H | -2.06967800 | -1.43305400 | 3.95943200  |
| H | -3.41304100 | -0.72730800 | 4.85028500  |
| H | -5.02671800 | -1.68195700 | 3.25831800  |
| H | -3.86864000 | -2.99678100 | 3.46891600  |
| H | -4.29165300 | -2.20180200 | 0.95530400  |
| H | -2.61093100 | -2.27818100 | 1.49160700  |
| H | -3.76797900 | 2.13831700  | -0.08256600 |
| H | -2.87262400 | 2.91859000  | 2.00312100  |
| H | -1.20815800 | 2.66818800  | 1.45450300  |
| H | -3.17047500 | 4.75853300  | 0.39340800  |
| H | -1.59071900 | 5.07888500  | 1.10898200  |
| H | -0.44082800 | 4.05638900  | -0.75649000 |
| H | -1.75263700 | 4.88161300  | -1.58861000 |
| H | -1.24684700 | 2.10273300  | -1.68195000 |
| H | -2.81487400 | 2.80516900  | -2.07735900 |
| H | -2.62011400 | 0.22008300  | -2.18902400 |
| H | -5.16626600 | -0.47444800 | -0.66278500 |
| H | -4.89016500 | 0.90313500  | -1.73034200 |
| H | -6.05947800 | -1.23044300 | -2.82828700 |
| H | -4.64024300 | -0.60027000 | -3.66343200 |
| H | -3.99694200 | -2.92125200 | -3.33179800 |
| H | -4.76822500 | -2.96798800 | -1.75675800 |
| H | -2.02304400 | -1.96589600 | -2.38900200 |
| H | -2.68967900 | -2.45594800 | -0.85363500 |
| H | 4.14675600  | -1.84526600 | -0.47466600 |
| H | 3.05101600  | -2.41466900 | -2.53004100 |
| H | 1.50586500  | -2.67647000 | -1.72421900 |
| H | 2.43639300  | -4.94671500 | -1.95669600 |
| H | 4.02059700  | -4.38551700 | -1.42363200 |
| H | 1.47931000  | -4.60379800 | 0.23727300  |
| H | 3.07443600  | -5.20044900 | 0.66778600  |
| H | 3.72273800  | -3.04835900 | 1.45345100  |
| H | 2.00131800  | -2.69545200 | 1.43244900  |

|   |             |             |             |
|---|-------------|-------------|-------------|
| H | 3.07085000  | -0.63686400 | 2.13829200  |
| H | 2.22589400  | 2.10844600  | 1.43022200  |
| H | 2.24915600  | 1.29954700  | 2.97137100  |
| H | 4.40578100  | 2.98008800  | 1.70845500  |
| H | 4.08330400  | 2.75448000  | 3.41990800  |
| H | 5.17935600  | 0.55880800  | 3.39152300  |
| H | 6.24431300  | 1.52926700  | 2.37361800  |
| H | 5.29791200  | -0.72041700 | 1.28703500  |
| H | 5.09473500  | 0.75898700  | 0.35077700  |
| H | 4.07091000  | 0.41422100  | -1.48109300 |
| H | 3.14706200  | -0.23260100 | -3.45750400 |
| H | 1.52350300  | -0.33356700 | -2.78147800 |
| H | 2.22961400  | 1.65810500  | -4.58587200 |
| H | 0.98820200  | 1.86252400  | -3.35252600 |
| H | 2.50407000  | 3.70090000  | -2.85014100 |
| H | 3.91775900  | 2.67752300  | -3.11246900 |
| H | 3.57787000  | 2.61071400  | -0.66146900 |
| H | 1.83911800  | 2.37726000  | -0.89283500 |
| H | 0.25420900  | 1.32480900  | 0.28771700  |
| H | -0.10105100 | 0.01375000  | -1.34316800 |
| H | -0.16397800 | -1.84460700 | -0.42166700 |
| H | -0.48655000 | -1.93450300 | 0.39051400  |
| H | 0.38538700  | -0.68725100 | 1.88796600  |
| H | -0.06659200 | 0.05837100  | 1.94234300  |
